# Supplementary material
Source: PubMed Central journal article supplement (PMC2944047)
Supplement: emboj2010166s2.pdf [file emboj2010166s2.pdf]

Manuscript EMBO-2010-74753

## **S6K1 is a multifaceted regulator of Mdm2 that connects nutrient status and DNA damage response**

Keng Po Lai, Wai Fook Leong, Jenny Fung Ling Chau, Deyong jia, Li Zeng, Huijuan Li, Lin He, Aijun Hao, Hongbing Zhang, David Meek, Chakradhar Velagapudi, Samy L. Habib and Baojie Li

*Corresponding author: Baojie Li, Institute of Molecular and Cell Biology*

---

### **Review timeline:**

Submission date:  
Accepted:

12 May 2010  
30 June 2010

---

### **Transaction Report:**

No Peer Review Process File is available with this article, as the authors have chosen not to make the review process public in this case.
